# Supplementary material for: Microglial depletion rescues spatial memory impairment caused by LPS administration in adult mice
Source: PeerJ. 2024 Nov 15;12:e18552. doi: 10.7717/peerj.18552 (PMC11572354; doi:10.7717/peerj.18552)
Supplement: Supplemental Information 1 [file peerj-12-18552-s001.xlsx]

## Sheet: Fig1
c)	Control	PLX3397
	522.385	121.788
	422.385	105.779
	389.088	103.095
	438.527	106.779
					open									close
e)	CON	68.1014	103.604	24.6	53.6333	20.2536	33.2332	85.4188	103.604		168.035	171.905	164	141.066	235.869	243.744	111.078	5.14437
	PLX5622	59.6597	14.281	67.3006	156.423	107.967	131.9	5.66666	45.1		169.803	228.662	204.505	48.7821	137.966	90.7999	229.766	168.2
					center									peri
f)	CON	173.407	53.7871	185.2	82.4999	124.691	111.511	96.5966	53.7871		426.627	546.246	412.566	515.266	475.342	488.522	503.437	546.246
	PLX5622	94.2943	37.671	44.5112	92.2923	82.4999	111.033	55.4333	60.6333		505.739	562.362	555.522	507.741	515.266	486.733	542.666	537.466
g)		PLX5622												CON
	1	61	51.5	47.5	61	50.25	47.75	61	46.75					54.25	48.5	61	39.75	61	50.25	61	61
	2	21.75	23.25	54.25	49.5	35	52.25	28.25	33.5					34.5	48.25	60.5	55.25	49.5	35	38.8	47.9
	3	29.25	51.75	47.25	39.5	10	34.5	48	23					43.25	38.75	61	58.25	39.5	10	37.2	34.1
	4	27.5	12.25	25.75	11	21.5	37.5	47	32.75					20.5	10.25	58.5	33	11	21.5	37.1	14.4
	5	43.25	22	47.75	6.25	8.5	44	33.25	16.75					17	15.75	30	48.75	6.25	8.5	33.8	25.7
	6	23.25	34.5	50.25	10.75	6.5	11.75	22.75	19.5					19.25	21.5	40.25	8.25	10.75	6.5	9.6	6.7
	7	1.9	21.55	6.7	35.65	10.8	34.15	2.75	13					16.6	9.8	10.6	11.8	8.8	10.3	11.6	22.55
h)		adj L								Training								adj R								Opp
	CON	7.966	10.063	18.449	5.241	0.418	0	3.347	17.155	54.507	48.008	45.283	44.444	57.322	58.577	52.72	50.628	32.704	30.608	24.528	34.591	35.146	41.423	41.004	25.941	4.822	11.321	11.74	15.723	7.113	0	2.929	6.276
	PLX5622	15.933	26.205	20.084	15.514	17.615	10.021	13.808	2.929	47.17	35.962	34.519	40.252	36.778	48.159	50.23	52.72	30.818	29.447	29.916	31.027	24.268	34.31	21.757	33.891	6.08	8.386	15.481	13.208	21.339	7.51	14.205	10.46
i)	CON	PLX5622
	12.106	13.721
	16.625	14.157
	14.136	13.189
	15.445	14.8
	17.109	15.871
	12.29	12.234
	11.403	11.54
	13.742	20.568

## Sheet: Fig2
b)		CON+LPS								PLX5622+LPS
	D1	61	61	61	61	61	61	51.5	61	39.25	47.25	54.75	61	58.45	61	61	61
	D2	48.75	49.25	55.7	61	50.75	41.75	53.25	61	61	61	33.6	32.95	51.05	42.4	61	61
	D3	27.25	61	57.75	36	47.75	29.25	51.75	54.2	33.55	52	61	15.6	15	38.75	61	61
	D4	46.75	47.2	38.05	60.75	34.5	37.5	32.25	56.25	50.7	51.1	52.95	11.2	24.3	4.45	47.95	46.825
	D5	43.5	42.2	53.85	61	46.5	43.25	22	60.15	26	19.4	53.45	5.5	16.65	23.9	40.075	24.525
	D6	50.5	51.6	43.7	61	25.25	23.25	34.5	61	32.7	29.2	29	9.85	7.9	14.7	38.425	8.15
	D7	38	41.35	32.25	61	54	33.5	23	61	15.4	11.95	32.5	4.55	13.75	21.65	21.675	8.325
c)		adj L										training										adj R										Opp
	CON+LPS	15.858	40.167	0	15.297	9.644	1.468	46.541	35.43			29.791	45.188	21.339	40.209	30.415	38.784	32.914	25.237			49.351	7.95	78.661	33.289	34.574	48.008	11.74	27.319			5	6.695	0	11.205	25.367	11.74	8.805	12.015
	PLX5622+LPS	3.766	23.849	11.297	3.766	10.042	2.092	2.51	8.368			92.887	31.799	46.025	43.096	65.69	69.038	75.314	89.54			3.347	30.126	33.054	50.628	21.339	23.431	22.176	2.092			0	14.226	9.623	2.51	2.929	5.439	0	0
d)	CON+LPS	PLX5622+LPS
	11.082	14.83
	12.93	13.818
	13.199	13.389
	12.728	8.876
	8.985	14.643
	13.856	10.987
	8.304	12.835
	9.791	16.523
e)		CON+LPS									Minocycline+LPS
	D1	61	61	61	61	61	61	61	61		61	61	61	61	61	61	54.6	61
	D2	61	61	61	53.6	61	61	61	61		33.3	61	33.3	37.1	34.1	61	27.3	61
	D3	61	61	61	47	61	61	61	42.45		39	61	61	26.6	32	53.55	54.3	61
	D4	31.8	61	53.2	16.5	53.7	61	47.9	61		25.1	26.7	35.2	36.5	42.6	13.6	8.5	20.15
	D5	61	61	57	20.3	24.2	61	44.85	61		55.9	61	12.5	6.9	11	61	16	61
	D6	61	61	22.3	61	61	61	19.9	61		6.7	38.2	39.2	34.8	34.3	26.35	16.4	2.25
	D7	61	61	21.4	3.8	21.8	61	45.85	61		17	10.7	15.2	41.6	18.2	16.55	3.2	5.45
		adj L								training								adj R								Opp
f)	CON+LPS	0	60.251	12.552	15.063	20.921	18.828	0	17.155	0	0	20.084	42.678	0	56.904	0	28.452	74.059	0	57.322	38.912	28.033	18.41	20.921	42.678	25.941	39.749	10.042	3.347	51.046	5.858	79.079	11.715
	Minocycline+LPS	16.736	20.084	19.247	10.879	20.921	8.368	25.523	16.736	41.004	35.565	62.343	54.393	58.577	79.079	57.741	27.615	33.473	29.707	14.226	32.636	10.46	7.113	8.787	38.494	8.787	14.644	4.184	2.092	10.042	5.439	7.95	17.155
g)	VEH+LPS	Minocycline+LPS
	5.453	13.854
	8.175	13.463
	9.531	8.115
	12.623	11.834
	11.283	14.825
	16.637	10.331
	4.229	12.288
	12.911	15.669

## Sheet: Fig3
b)		C57BL/6+LPS										C57BL/6+PLX5622+LPS
	10	11.2406	0.05085	1.06812	1.2207	0.14765	0	0	0.5788	0		2.37127	1.27155	0	0	0	0	0.35605	0.5595	3.4727
	20	2.4414	1.7802	1.16985	1.0681	1.09765	0.50865	0.76295	1.19615	0.05085		2.63258	0.4069	1.72935	0	0.20345	0	0.7121	0.2543	4.4093
	40	10.9354	2.54315	4.09443	5.9001	4.6777	4.32335	3.35695	5.5984	12.2071		9.93137	4.01815	6.86645	4.11985	3.45865	3.0009	4.3742	3.5604	13.9118
	60	14.6485	6.20525	7.37508	18.514	10.8846	7.27335	18.0054	10.6847	29.8055		17.6476	6.71385	12.4105	5.6966	5.49315	5.4423	8.34145	5.34055	21.8131
	80	28.5339	26.1943	7.70573	22.7356	11.3998	8.79925	25.177	14.1819	35.7565		30.7157	10.3251	20.5994	23.1425	17.8528	13.6821	19.7347	15.0045	34.02
	100	18.2597	14.5976	8.64668	24.1598	12.2596	11.1389	28.9409	17.9423	37.028		71.6856	39.7746	56.3558	79.4983	30.6701	41.9109	48.6756	39.9272	50.5013
c)		C57BL/6+LPS										C57BL/6+PLX5622+LPS
	10	115.553	111.989	117.321	93.6551	109.241	120.27	98.4927	129.527	86.2117		125.211	106.868	105.89	93.5826	112.454	105.619	104.545	103.187	126.189
	25	140.559	142.329	105.189	119.6	138.791	139.295	126.966	154.762	96.1892		144.445	146.735	147.604	120.056	114.945	132.014	132.395	130.375	117.106
	50	139.597	144.289	106.697	108.926	129.029	144.491	156.574	170.928	113.369		188.757	138.757	179.158	135.329	166.939	130.954	147.815	150.408	142.077
	100	138.92	125.72	109.706	94.1636	123.57	114.057	104.409	136.725	100.144		115.658	124.045	149.992	118.991	119.64	124.77	162.501	121.223	161.102
	200	107.457	118.965	104.38	101.746	118.971	95.1062	94.5233	110.402	96.6001		103.399	116.626	109.422	111.729	114.751	111.521	128.177	110.889	121.88
	400	95.7137	108.678	99.1565	96.6703	120.996	102.42	113.658	107.992	82.1137		99.0595	108.523	97.9172	101.053	108.275	102.93	113.424	93.6844	102.494
d)		C57BL/6+LPS												C57BL/6+PLX5622+LPS
	-10	98.3818	94.3062	108.406	99.8319	91.6029	91.8918	111.472	96.5515	80.8383		100.888	101.336	101.405	89.3507	107.75	98.3215	104.351	103.75	101.576
	-9	97.6071	99.2882	106.061	92.2818	85.2419	72.0717	132.035	90.6402	98.3034		100.888	101.021	107.319	99.2206	98.2985	119.905	102.774	106.667	102.438
	-8	99.1565	96.0855	110.751	107.382	78.8809	92.7925	100.108	102.463	101.297		101.479	101.547	99.5316	99.4806	100.188	110.312	102.144	100.833	104.162
	-7	98.8122	96.797	109.668	97.3141	106.871	82.8833	95.2381	99.5079	104.291		101.775	101.021	97.8922	101.299	101.134	112.71	101.513	105.278	103.177
	-6	99.2425	98.9324	105.339	87.2495	101.781	101.802	100.649	113.3	105.289		101.183	100.915	98.2436	101.818	102.08	100.72	101.513	96.6667	101.77
	-5	99.9311	84.6976	102.092	97.3141	83.9687	75.6761	99.5671	123.153	96.3074		100.888	101.126	97.6581	103.117	101.607	100.72	100.883	91.3889	108.206
	-4	97.7793	92.1708	104.978	104.027	96.6919	97.2976	91.9911	106.404	108.283		102.367	101.231	99.2974	102.597	102.08	95.9229	102.459	90.8334	108.608
	-3	97.8654	99.644	98.8455	95.6383	83.9687	108.108	91.9911	90.6402	97.8045		100.888	102.389	98.4777	100.779	100.188	95.9229	101.829	92.4999	110.217
	-2	97.8654	107.473	103.174	106.544	109.415	106.306	79.0041	98.522	97.8045		102.663	101.968	98.1265	101.039	103.969	88.7281	101.829	93.3333	104.988
	-1	100.189	103.559	97.0419	104.027	73.7906	111.712	86.5801	105.419	109.781		103.287	101.021	98.2436	101.299	107.75	98.3204	99.9369	94.1667	105.792
	0
	1	167.786	172.954	144.295	151.005	147.584	165.135	174.243	157.718	147.65		152.92	147.846	151.219	160	173.913	129.497	133.131	143.056	120.274
	2	137.582	131.068	116.162	137.582	142.495	117.116	162.338	144.295	140.941		155.512	145.617	156.096	161.299	172.023	127.097	125.567	129.075	141.995
	3	112.412	119.609	116.162	130.873	137.406	129.729	160.173	134.227	120.758		152.31	148.217	160.973	161.818	170.133	127.097	122.541	116.944	154.465
	4	99.8451	114.253	105.339	127.518	117.049	102.702	146.104	128.355	114.271		150.328	148.217	117.072	158.441	168.241	127.097	122.541	101.389	147.224
	5	98.3819	108.897	107.865	120.805	99.2371	118.919	155.844	117.241	116.267		152.005	146.731	112.195	156.364	168.241	119.905	128.592	108.889	154.465
	6	99.2425	96.0855	104.978	120.805	91.6029	93.6932	152.598	107.39	116.267		149.413	148.96	126.831	156.104	166.351	122.302	124.055	103.611	144.409
	7	100.275	96.7974	100.288	117.45	91.6029	82.8833	149.351	107.882	119.261		149.261	145.617	131.707	156.104	170.133	117.505	118.003	102.222	130.33
	8	98.2097	97.5093	92.7129	114.095	91.6029	104.505	153.68	108.375	115.769		153.072	148.217	129.269	150.13	164.462	110.312	118.003	111.111	129.928
	9	99.3287	96.797	102.092	107.382	104.325	111.712	143.94	103.449	104.79		148.651	147.474	130.488	149.87	166.351	110.312	118.003	91.9445	136.364
	10	100.017	91.8154	105.7	104.027	108.142	104.505	162.338	98.03	103.793		149.565	147.846	131.707	151.948	170.133	107.913	119.516	96.9444	115.044
	11	98.2958	101.068	103.535	100.671	104.325	138.738	153.68	92.6111	109.781		150.48	148.217	136.584	149.611	160.68	115.107	114.977	111.389	112.87
	12	98.4679	105.338	99.9279	97.3141	111.959	102.702	124.459	97.537	121.257		148.651	144.502	117.072	154.286	158.79	111.51	108.925	92.7777	126.732
	13	98.8983	100.356	110.751	100.67	119.593	144.143	148.269	94.5811	105.789		152.005	147.474	126.831	152.208	162.572	115.107	111.952	111.389	116.832
	14	98.4679	96.0855	101.371	104.025	115.776	120.721	139.611	98.522	119.261		148.651	149.703	131.707	152.727	158.79	115.107	113.464	92.7777	122.773
	15	97.8654	111.032	101.731	110.737	112.596	82.8833	134.199	95.567	122.255		153.225	150.074	119.513	156.104	153.118	107.913	124.055	95.8333	120.791
	16	98.0376	93.9501	116.162	115.771	109.415	104.505	140.693	85.7143	107.785		148.498	144.502	107.319	157.143	149.339	112.71	114.977	110.556	122.773
	17	99.5008	89.68	94.1559	120.805	119.593	99.099	116.883	98.522	101.796		147.888	145.988	121.949	150.909	151.228	123.501	108.925	100.555	130.694
	18	99.9311	98.9324	95.2382	107.382	111.959	129.729	134.199	105.419	119.761		150.023	144.502	121.949	153.247	149.339	134.292	108.925	96.111	122.773
	19	98.8122	110.32	91.9912	109.061	104.325	127.928	128.788	112.316	110.279		151.7	145.988	129.267	152.208	145.557	117.505	110.438	95.8333	127.723
	20	98.2958	99.644	111.832	103.188	109.414	106.306	127.706	105.419	117.765		152.92	146.731	136.584	148.831	145.557	125.898	114.221	104.722	132.673
	21	98.554	108.897	93.7952	97.3141	114.503	106.306	116.883	103.448	107.285		152.157	144.874	136.584	146.753	141.777	117.505	118.003	92.4999	134.653
	22	100.275	89.68	107.143	115.771	99.2371	136.936	126.624	101.478	104.79		151.852	145.988	131.707	145.195	141.777	121.702	116.112	96.9444	130.694
	23	99.9311	95.3739	105.7	134.227	134.859	118.919	125.541	108.375	117.265		150.328	145.245	126.831	147.532	145.557	117.505	104.386	105.833	136.633
	24	98.8983	100.356	99.2062	127.518	124.681	115.315	133.117	107.882	121.257		153.834	147.102	117.072	144.156	145.557	117.505	107.413	105.833	134.653
	25	99.673	93.2385	103.535	147.65	117.048	115.315	126.624	107.39	123.253		150.633	147.846	119.512	142.338	136.106	115.107	105.9	95.2779	118.811
	26	99.759	91.8154	102.814	130.873	109.415	102.702	114.719	98.522	112.774		149.108	144.502	121.951	143.117	141.777	112.71	111.952	93.3333	130.694
	27	97.1768	96.0855	91.9912	120.805	117.049	91.8918	124.459	93.5961	104.291		147.888	144.131	120.732	138.182	145.557	119.905	118.003	102.222	112.87
	28	97.7793	83.2744	94.5165	110.737	96.6932	108.108	121.212	93.5961	103.793		148.803	144.502	121.949	139.221	137.996	110.312	115.34	105.555	124.752
	29	99.2425	105.338	103.896	120.805	127.228	88.2873	125.541	91.6252	111.277		150.023	142.645	129.267	143.636	139.887	115.107	112.676	95.5556	130.694
	30	98.7262	98.9324	94.8772	130.873	145.037	108.108	126.624	104.434	114.271		149.261	149.332	136.584	144.935	137.996	124.7	110.329	105	116.832
	31	100.62	99.644	103.535	117.45	96.6932	88.2873	113.637	106.404	109.781		148.193	144.502	132.925	145.714	137.996	110.312	110.329	109.445	136.633
	32	99.0704	101.779	102.092	114.095	114.503	122.522	111.472	100.493	105.289		143.924	144.502	136.584	135.584	130.434	115.107	110.329	99.4443	122.773
	33	98.4679	103.203	99.9279	109.061	109.415	127.928	122.295	108.375	106.786		151.09	147.474	126.831	135.325	126.654	110.312	114.031	90.8334	136.633
	34	98.8122	103.203	94.5165	104.027	103.053	144.143	121.212	109.36	97.3052		153.225	150.446	112.195	136.104	128.544	107.913	109.933	98.0555	132.673
	35	97.8654	103.915	98.1242	111.578	103.689	106.306	120.13	111.823	109.281		147.888	144.502	117.072	139.74	130.434	119.905	111.982	106.667	140.594
	36	97.5211	106.05	107.504	107.803	104.325	120.721	127.706	114.285	102.794		153.377	150.074	112.195	139.481	126.654	115.107	113.85	111.945	126.732
	37	98.4679	112.456	91.6305	109.69	109.415	109.909	113.637	113.054	104.79		148.498	144.502	117.072	130.649	124.764	112.71	115.719	99.4443	120.791
	38	98.64	93.2385	95.2382	117.45	108.143	144.143	119.048	115.148	111.777		148.498	144.502	126.831	130.909	126.654	115.107	114.784	105.555	142.574
	39	98.64	106.05	92.3522	137.582	106.87	90.0905	109.308	117.241	97.8045		148.651	144.131	126.831	133.506	124.764	107.913	114.347	106.667	116.832
	40	108.366	98.9324	97.7632	127.516	100.508	111.712	107.143	114.778	101.297		149.718	143.388	126.831	134.026	117.203	117.505	113.91	104.722	112.871
	41	108.366	91.8154	97.4025	107.382	94.1468	142.342	112.554	112.316	91.8161		143.315	132.987	121.951	120.26	124.764	122.302	107.522	111.667	108.911
	42	110.26	91.8154	103.896	117.449	96.6919	113.513	126.624	104.434	112.774		146.364	140.788	124.391	122.597	118.148	107.913	112.524	120	122.773
	43	110.088	101.779	98.1242	114.303	99.2371	102.702	100.649	108.375	101.297		146.364	139.673	117.072	123.896	111.531	117.505	117.526	102.5	146.535
	44	98.3819	103.203	89.4662	111.157	94.1468	115.315	123.377	106.404	104.291		150.023	144.874	120.732	128.571	115.311	124.7	108.727	105.278	152.474
	45	110.26	102.491	89.8269	108.431	99.2358	135.135	122.295	102.463	110.279		149.718	144.502	118.902	126.234	115.311	112.71	106.557	105.278	150.494
	46	108.711	94.6623	102.092	107.068	101.78	90.0905	111.472	105.419	98.3034		146.516	141.159	117.072	122.215	113.421	110.311	107.763	118.611	144.554
	47	110.174	98.5767	87.3015	105.705	104.325	138.738	111.472	108.375	94.3114		151.852	146.36	117.987	120.205	111.531	107.913	113.549	106.944	140.594
	48	112.154	90.3915	94.8772	106.386	96.6932	124.323	113.637	112.316	109.281		146.821	144.874	117.072	118.195	115.311	107.913	108.365	108.334	154.456
	49	108.538	94.4841	97.0419	102.69	91.6029	124.323	120.13	97.537	95.3092		147.583	141.902	136.584	119.666	117.203	107.913	113.428	102.222	134.653
	50	109.485	93.9501	101.731	98.9932	94.148	93.6932	110.39	104.926	96.3074		148.803	144.874	126.828	118.849	114.367	119.905	118.491	120.278	112.87
	51	109.485	101.779	102.814	100.841	119.593	108.108	110.39	110.099	91.8161		147.736	143.016	136.584	119.053	111.531	113.909	110.174	105.555	136.633
	52	109.657	92.5269	98.8455	104.112	106.871	108.108	126.624	115.271	93.812		152.31	147.102	117.072	119.258	109.642	112.111	108.968	108.055	146.535
	53	106.731	92.5269	101.371	107.382	104.325	135.135	108.225	108.375	97.8045		149.108	145.988	136.584	117.551	103.97	110.312	109.812	119.722	156.436
	54	108.797	96.0855	104.978	112.416	105.598	95.4945	108.225	105.911	95.3092		147.431	147.474	121.949	115.844	103.97	105.515	115.839	107.5	130.694
	55	109.916	94.6623	96.3202	117.45	96.6932	135.135	95.2381	103.448	94.8103		146.821	141.902	121.949	113.506	103.97	107.914	113.187	116.389	142.574
	56	108.883	93.9501	96.3202	116.611	101.145	144.143	115.801	104.433	101.796		150.633	144.131	121.949	116.623	103.025	110.312	111.138	106.111	144.554
	57	107.936	98.2209	104.978	115.772	96.6932	127.928	98.4851	105.419	104.291		153.682	145.988	117.072	111.688	102.08	112.71	112.886	100.555	122.773
	58	110.604	98.9324	90.5482	104.027	115.776	151.351	113.637	101.478	94.3114		147.279	142.274	126.831	111.688	103.97	105.515	114.633	120.833	142.574
	59	108.625	102.491	91.9912	100.671	103.689	102.702	114.719	97.537	113.273		149.108	141.53	121.949	114.286	103.97	109.113	115.839	121.667	132.673
	60	110.862	106.05	90.5482	97.3141	91.6029	95.4945	106.061	94.5811	97.8045		146.516	138.559	124.39	117.662	102.08	107.314	115.236	111.111	137.624
e)	CON+LPS	PLX5622+LPS
	119.871	152.615
	123.201	147.326
	129.356	139.511
	117.964	159.584
	133.557	170.51
	128.754	126.139
	126.72	126.474
	136.368	143.685
	127.978	148.04
f)	CON+LPS	PLX5622+LPS
	110.93	148.399
	108.896	142.998
	97.0197	123.246
	97.0238	118.892
	107.808	110.255
	100.7	111.69
	119.189	112.108
	105.456	138.069
	99.95	108.399

## Sheet: Sheet4
Iba-1	CON+LPS	PLX5622+LPS		Cd68	CON+LPS	PLX5622+LPS		IL-6	CON+LPS	PLX5622+LPS
	1.49658	0.250289			1.37872	0.621287			1.82696	1.46816
	1.52802	0.339543			1.69741	0.689362			1.90972	1.33891
	1.92075	0.507566			1.35974	0.374577			1.8536	1.2784
	1.27603	0.0738974			1.60584	0.837019			2.47073	1.31381
	1.40607	0.0975082			1.45734	0.56383
								Ab1-42	CON+LPS	PLX5622+LPS
Tmem119	CON+LPS	PLX5622+LPS		Bdnf	CON+LPS	PLX5622+LPS			1.45333	1.54388
	0.668191	0.16361			0.247586	0.667112			1.2668	1.15661
	0.726147	0.0913997			0.333556	0.419284			1.53239	1.46715
	0.422884	0.294565			0.523405	0.498616			1.41672	1.46504
	0.269495	0.101414			0.340564	0.576743
	0.329496	0.0403394			0.843438	0.396667		Ab1-40	CON+LPS	PLX5622+LPS
									2.18658	1.16598
Il-6	CON+LPS	PLX5622+LPS		Syp	CON+LPS	PLX5622+LPS			1.68255	1.13779
	1.7033	0.80571			0.450625	1.04247			2.304	1.52754
	1.64528	0.397309			0.532185	1.16473			2.27056	1.41263
	1.32715	0.531571			0.582367	1.21419
	1.46239	0.288838			0.482968	1.23971
	1.29984	0.225052			0.646176	0.902655
